# Supplementary material for: Low-Frequency Intermittent Hypoxia Suppresses Subcutaneous Adipogenesis and Induces Macrophage Polarization in Lean Mice
Source: PubMed Central journal article supplement — Diabetes Metab J. 2019 Apr 23;43(5):659–74. doi: 10.4093/dmj.2018.0196 (PMC6834831; doi:10.4093/dmj.2018.0196), 2019-04-23
Supplement: dmj-43-659-s001.pdf [file dmj-43-659-s001.pdf]

**Supplementary Table 1.** Primer sequences used in this study

| Gene names     | Forward primer (5'-3') | Reverse primer (5'-3')   |
|----------------|------------------------|--------------------------|
| <i>mFabp4</i>  | CCGCAGACGACAGGA        | CTCATGCCCTTTCATAAACT     |
| <i>mPparg</i>  | GGAAGACCACTCGCATTTCCTT | GTAATCAGCAACCATTGGGTCA   |
| <i>mCebpa</i>  | GCGGGAACGCAACAACATC    | GTCACTGGTCAACTCCAGCAC    |
| <i>mGlut4</i>  | ACACTGGTCCTAGCTGTATTCT | CCAGCCACGTTGCATTGTA      |
| <i>mNos2</i>   | CCAAGCCCTCACCTACTTCC   | CTCTGAGGGCTGACACAAGG     |
| <i>mF4/80</i>  | CTTTGGCTATGGGCTTCCAGTC | GCAAGGAGGACAGAGTTTATCGTG |
| <i>mArg1</i>   | CTCCAAGCCAAAGTCCTTAGAG | AGGAGCTGTCATTAGGGACATC   |
| <i>mTnfa</i>   | ACGGCATGGATCTCAAAGAC   | AGATAGCAAATCGGCTGACG     |
| <i>mChi313</i> | AGAAGGGAGTTTCAAACCTGGT | GTCTTGCTCATGTGTGTAAGTGA  |
| <i>mGapdh</i>  | TGAAGCAGGCATCTGAGGG    | CGAAGGTGGAAGAGTGGGAG     |

*mFabp4*, mouse fatty acid-binding protein 4; *mPparg*, mouse peroxisome proliferator-activator- $\gamma$ ; *mCebpa*, mouse CCAAT/enhancer binding protein- $\alpha$ ; *mGlut4*, mouse glucose transporter type 4; *mNos2*, mouse nitric oxide synthase 2; *mArg1*, mouse arginase 1; *mTnfa*, mouse tumor necrosis factor- $\alpha$ ; *mChi313*, mouse chitinase-like lectin; *mGapdh*, mouse glyceraldehyde 3-phosphate dehydrogenase.
