# Supplementary material for: Low-Frequency Intermittent Hypoxia Suppresses Subcutaneous Adipogenesis and Induces Macrophage Polarization in Lean Mice
Source: PubMed Central journal article supplement — Diabetes Metab J. 2019 Apr 23;43(5):659–74. doi: 10.4093/dmj.2018.0196 (PMC6834831; doi:10.4093/dmj.2018.0196), 2019-04-23
Supplement: dmj-43-659-s002.pdf [file dmj-43-659-s002.pdf]

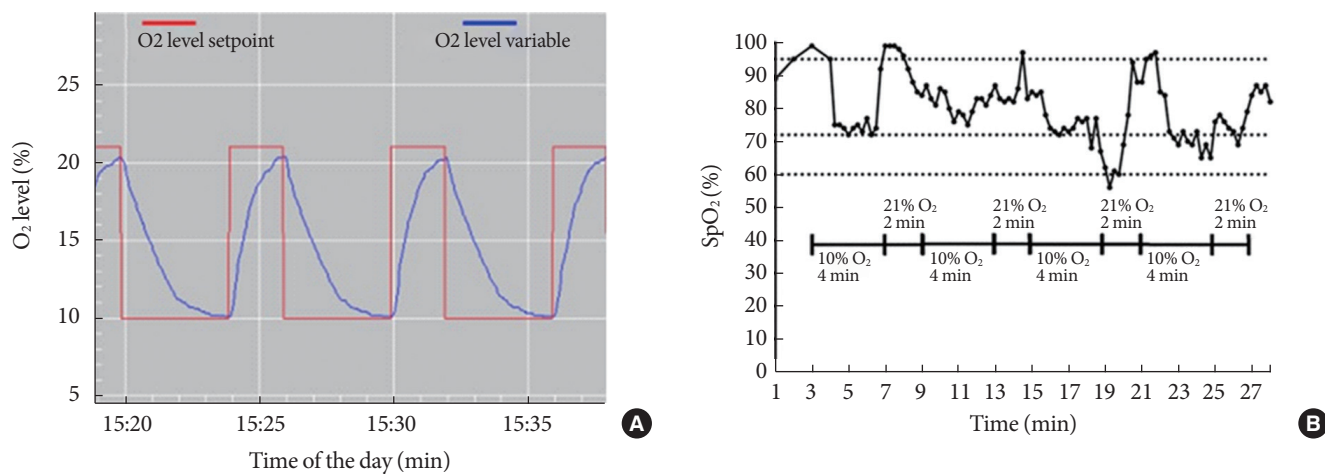

**Supplementary Fig. 1.** (A) IH10 profile generated from a BioSpherix Oxycycler A84 system. (B) Fluctuation of oxyhaemoglobin saturation (SpO<sub>2</sub>) monitored by a MouseVent G500 (Kent Scientific Corp.) in IH10-exposed mice.
