# Supplementary material for: Low-Frequency Intermittent Hypoxia Suppresses Subcutaneous Adipogenesis and Induces Macrophage Polarization in Lean Mice
Source: PubMed Central journal article supplement — Diabetes Metab J. 2019 Apr 23;43(5):659–74. doi: 10.4093/dmj.2018.0196 (PMC6834831; doi:10.4093/dmj.2018.0196), 2019-04-23
Supplement: dmj-43-659-s003.pdf [file dmj-43-659-s003.pdf]

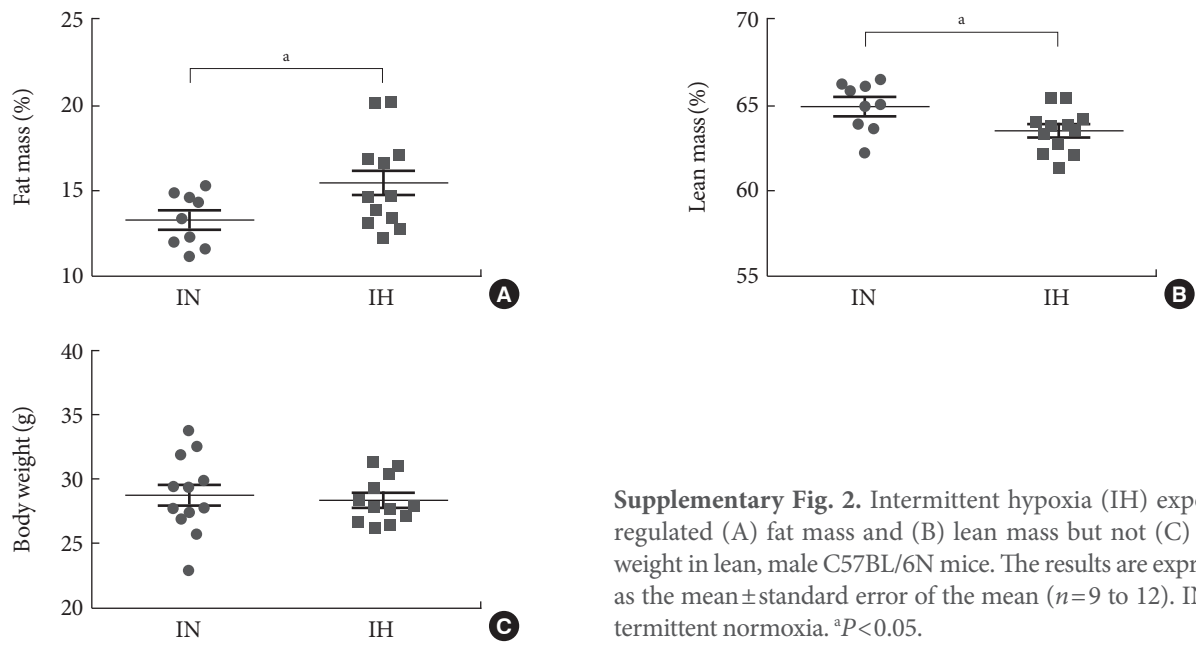

**Supplementary Fig. 2.** Intermittent hypoxia (IH) exposure regulated (A) fat mass and (B) lean mass but not (C) body weight in lean, male C57BL/6N mice. The results are expressed as the mean  $\pm$  standard error of the mean ( $n=9$  to 12). IN, intermittent normoxia. <sup>a</sup> $P<0.05$ .
