# Supplementary material for: Low-Frequency Intermittent Hypoxia Suppresses Subcutaneous Adipogenesis and Induces Macrophage Polarization in Lean Mice
Source: PubMed Central journal article supplement — Diabetes Metab J. 2019 Apr 23;43(5):659–74. doi: 10.4093/dmj.2018.0196 (PMC6834831; doi:10.4093/dmj.2018.0196), 2019-04-23
Supplement: dmj-43-659-s004.pdf [file dmj-43-659-s004.pdf]

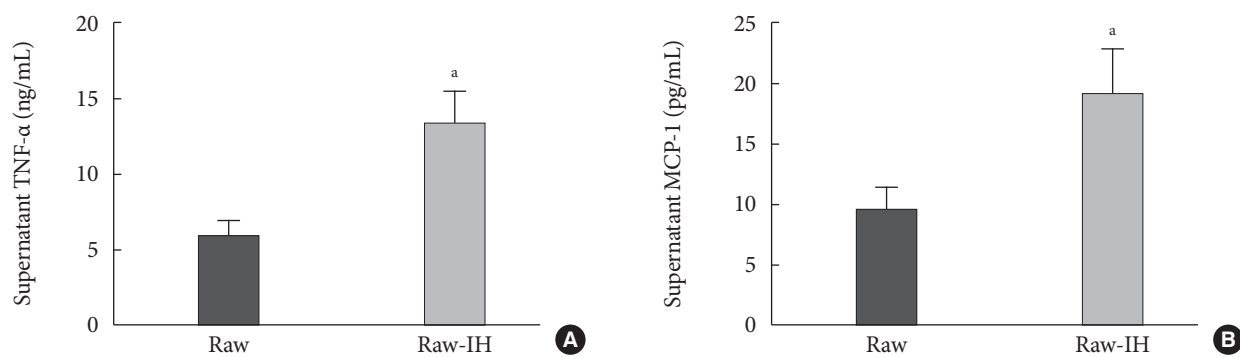

**Supplementary Fig. 3.** (A) Tumor necrosis factor- $\alpha$  (TNF- $\alpha$ ) and (B) monocyte chemoattractant protein-1 (MCP-1) were measured in conditioned media (CdM) from air-exposed RAW 264.7 (Raw) and intermittent hypoxia (IH)-exposed RAW 264.7 (Raw-IH). The results are expressed as the mean  $\pm$  standard error of the mean ( $n=4$  to 5). <sup>a</sup> $P<0.05$ .
